# Supplementary material
Source: PubMed Central journal article supplement (PMC2674498)

## Electronic supplementary material

Figure 1. Leaf vein densities in 90 tropical/subtropical dicots sampled in South Florida. Data derived from: Wylie, R. B. 1946 Relations between tissue organization and vascularization in leaves of certain tropical and subtropical dicotyledons. *Am. J. Bot.* **33**, 721-726.

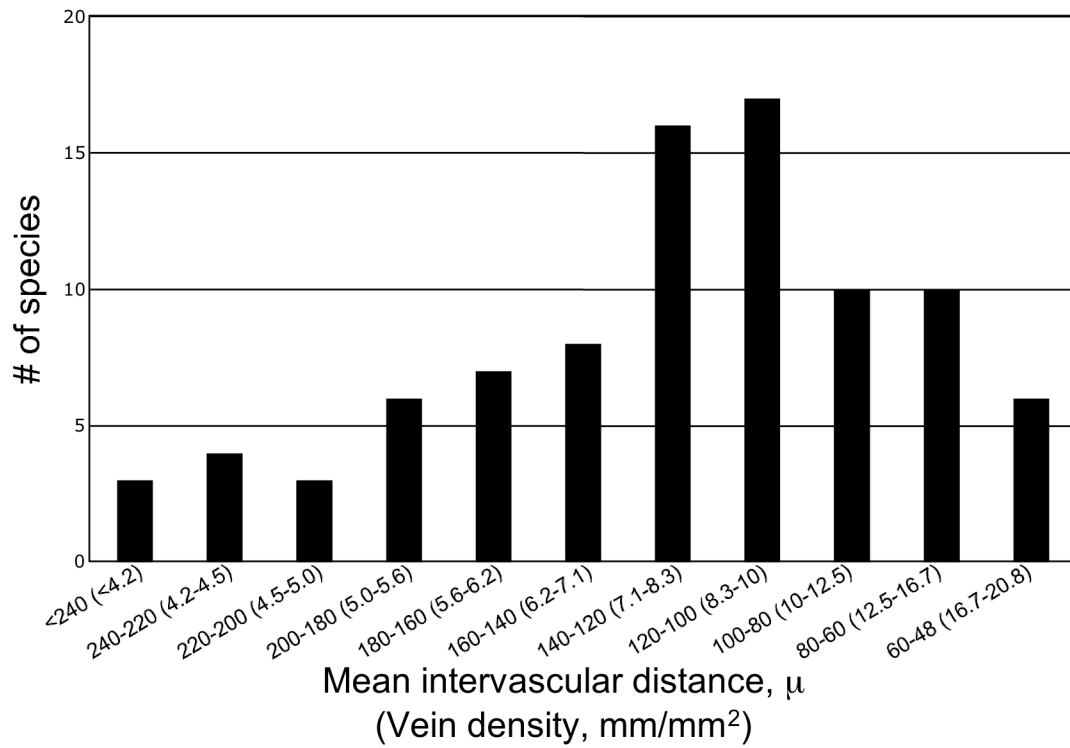

Supplement: rspb20081919s05.pdf [file rspb20081919s05.pdf]
