# Supplementary material
Source: PubMed Central journal article supplement (PMC2674498)
Supplement: rspb20081919s06.pdf [file rspb20081919s06.pdf]

Table 1: Leaf vein densities, ages, and affinities. For living plants, basic growth habit indicated: (T)ree or shrub, (V)ine or liana, and (H)erb or subshrub. Sun and shade-specific samples (along with North and South facing subsets of sun leaves) indicated where appropriate. References provided as numerical footnotes where density values were either derived directly from the literature or measured from figured specimens. For species with multiple samples, all measurements are included in determination of the minimum-maximum range of the lineage, but a single mean value for each species is included for calculation of lineage means.

| Taxon                                            | Lineage             | Age           | Vein density |
|--------------------------------------------------|---------------------|---------------|--------------|
| <i>Abutilon theophrasti</i> <sup>H, 46</sup>     | Eurosids 2          | Extant        | 18.2         |
| <i>Abutilon theophrasti</i> <sup>H, 6</sup>      | Eurosids 2          | Extant        | 10.4         |
| <i>Acer platanoides</i> <sup>T, NORTH, 48</sup>  | Eurosids 2          | Extant        | 6.3          |
| <i>Acer platanoides</i> <sup>T, SHADE, 48</sup>  | Eurosids 2          | Extant        | 5.5          |
| <i>Acer platanoides</i> <sup>T, SOUTH, 48</sup>  | Eurosids 2          | Extant        | 7.8          |
| <i>Acer rubrum</i> <sup>T, 35</sup>              | Eurosids 2          | Extant        | 8.0          |
| <i>Acer saccharinum</i> <sup>T, 46</sup>         | Eurosids 2          | Extant        | 7.0          |
| <i>Acer saccharinum</i> <sup>T, 6</sup>          | Eurosids 2          | Extant        | 7.0          |
| <i>Acer saccharum</i> <sup>T, 36</sup>           | Eurosids 2          | Extant        | 9.0          |
| <i>Acer saccharum</i> <sup>T, NORTH, 48</sup>    | Eurosids 2          | Extant        | 5.7          |
| <i>Acer saccharum</i> <sup>T, SHADE, 48</sup>    | Eurosids 2          | Extant        | 5.3          |
| <i>Acer saccharum</i> <sup>T, SOUTH, 48</sup>    | Eurosids 2          | Extant        | 6.3          |
| <i>Acorus</i> sp. <sup>H</sup>                   | Monocot             | Extant        | 5.2          |
| <i>Acrostichum aureum</i> <sup>H, 40</sup>       | Basal polypodiales  | Extant        | 2.0          |
| <i>Acrostichum danaeifolium</i> <sup>H, 40</sup> | Basal polypodiales  | Extant        | 2.5          |
| <i>Agathis robusta</i> <sup>T</sup>              | Coniferales         | Extant        | 1.2          |
| <i>Ailanthus glandulosa</i> <sup>T, 46</sup>     | Eurosids 2          | Extant        | 16.4         |
| <i>Ailanthus glandulosa</i> <sup>T, 6</sup>      | Eurosids 2          | Extant        | 11.2         |
| <i>Alethopteris davreuxii</i> <sup>13</sup>      | Medullosales        | Pennsylvanian | 3.0          |
| <i>Alethopteris decurrens</i> <sup>13</sup>      | Medullosales        | Pennsylvanian | 4.0          |
| <i>Alethopteris lancifolia</i> <sup>44</sup>     | incertae sedis      | Pennsylvanian | 4.4          |
| <i>Alethopteris lonchitica</i> <sup>45</sup>     | Medullosales        | Pennsylvanian | 4.7          |
| <i>Alethopteris serlii</i> <sup>44</sup>         | Medullosales        | Pennsylvanian | 2.6          |
| <i>Alethopteris urophylla</i> <sup>15</sup>      | incertae sedis      | Pennsylvanian | 3.9          |
| <i>Alethopteris valida</i> <sup>15</sup>         | Medullosales        | Pennsylvanian | 2.0          |
| <i>Amaranthus retroflexus</i> <sup>H, 46</sup>   | Basal core eudicots | Extant        | 6.8          |
| <i>Amborella trichopoda</i> <sup>T</sup>         | Basal angiosperms   | Extant        | 2.3          |
| <i>Amborella trichopoda</i> <sup>T, SHADE</sup>  | Basal angiosperms   | Extant        | 4.6          |
| <i>Amborella trichopoda</i> <sup>T, SHADE</sup>  | Basal angiosperms   | Extant        | 4.1          |
| <i>Amborella trichopoda</i> <sup>T, SUN</sup>    | Basal angiosperms   | Extant        | 5.1          |
| <i>Ambrosia artemisiifolia</i> <sup>H, 46</sup>  | Euasterids 2        | Extant        | 10.2         |
| <i>Ambrosia trifida</i> <sup>H, 46</sup>         | Euasterids 2        | Extant        | 8.3          |
| <i>Ambrosia trifida</i> <sup>H, 36</sup>         | Euasterids 2        | Extant        | 12.6         |
| <i>Ambrosia trifida</i> <sup>H, 6</sup>          | Euasterids 2        | Extant        | 8.6          |
| <i>Amelanchier alnifolia</i> <sup>T, 46</sup>    | Eurosids 2          | Extant        | 8.0          |
| <i>Anacardium occidentale</i> <sup>T, 35</sup>   | Eurosids 2          | Extant        | 7.1          |
| <i>Anemia aurita</i> <sup>H, 40</sup>            | Schizaeales         | Extant        | 2.1          |

|                                                             |                    |          |      |
|-------------------------------------------------------------|--------------------|----------|------|
| <i>Anemia phyllitidis</i> <sup>H, 40</sup>                  | Schizaeales        | Extant   | 1.0  |
| <i>Anetium citrifolium</i> <sup>H, 40</sup>                 | Basal polypodiales | Extant   | 0.3  |
| <i>Aniba excelsa</i> <sup>T, 29</sup>                       | Magnoliids         | Extant   | 2.6  |
| <i>Aniba riparaia</i> <sup>T, 29</sup>                      | Magnoliids         | Extant   | 2.9  |
| <i>Anomozamites nilssoni</i> <sup>27</sup>                  | Bennettitales      | Jurassic | 1.7  |
| <i>Antennaria</i> sp. <sup>H, 46</sup>                      | Euasterids 2       | Extant   | 6.8  |
| <i>Antrophyum cajenense</i> <sup>H, 40</sup>                | Basal polypodiales | Extant   | 0.5  |
| <i>Antrophyum lineatum</i> <sup>H, 40</sup>                 | Basal polypodiales | Extant   | 0.7  |
| <i>Apeiba membranacea</i> <sup>T, 35</sup>                  | Eurosids 2         | Extant   | 8.5  |
| <i>Apocynum cannabinum</i> <sup>H, 6</sup>                  | Euasterids 1       | Extant   | 8.5  |
| <i>Arabidopsis thaliana</i> <sup>H, 14</sup>                | Eurosids 2         | Extant   | 6.2  |
| <i>Araucaria araucana</i> <sup>T, 35</sup>                  | Coniferales        | Extant   | 1.2  |
| <i>Arbutus menziesii</i> <sup>T, 46</sup>                   | Basal asterids     | Extant   | 5.8  |
| <i>Archaeopteris halliana</i> <sup>22</sup>                 | Archaeopteridales  | Devonian | 3.1  |
| <i>Archaeopteris hibernica</i> <sup>37</sup>                | Archaeopteridales  | Devonian | 1.3  |
| <i>Archaeopteris roemeriana</i> <sup>37</sup>               | Archaeopteridales  | Devonian | 3.7  |
| <i>Arctium minus</i> <sup>H, 46</sup>                       | Euasterids 2       | Extant   | 6.7  |
| <i>Arctium minus</i> <sup>H, 6</sup>                        | Euasterids 2       | Extant   | 5.9  |
| <i>Arctostaphylos columbiana</i> <sup>T, 46</sup>           | Basal asterids     | Extant   | 8.4  |
| <i>Aristolochia durior</i> <sup>V, 46</sup>                 | Magnoliids         | Extant   | 6.2  |
| <i>Ascarina philippinensis</i> <sup>T, SHADE</sup>          | Chloranthaceae     | Extant   | 4.0  |
| <i>Ascarina philippinensis</i> <sup>T, SUN</sup>            | Chloranthaceae     | Extant   | 4.7  |
| <i>Ascarina rubricaulis</i> <sup>T, SHADE</sup>             | Chloranthaceae     | Extant   | 2.4  |
| <i>Ascarina rubricaulis</i> <sup>T, SUN</sup>               | Chloranthaceae     | Extant   | 4.6  |
| <i>Ascarina solmsiana</i> <sup>T, SHADE</sup>               | Chloranthaceae     | Extant   | 4.4  |
| <i>Ascarina solmsiana</i> <sup>T, SUN</sup>                 | Chloranthaceae     | Extant   | 4.6  |
| <i>Asclepias syriaca</i> <sup>H, 46</sup>                   | Euasterids 1       | Extant   | 8.5  |
| <i>Austrobaileya scandens</i> <sup>V, SHADE</sup>           | Basal angiosperms  | Extant   | 1.9  |
| <i>Austrobaileya scandens</i> <sup>V, SUN</sup>             | Basal angiosperms  | Extant   | 2.2  |
| <i>Avicennia germinans</i> <sup>T, 35</sup>                 | Euasterids 1       | Extant   | 4.1  |
| <i>Baptisia leucantha</i> <sup>H, 6</sup>                   | Eurosids 1         | Extant   | 9.1  |
| <i>Bedfordia salicina</i> <sup>T</sup>                      | Euasterids 2       | Extant   | 5.7  |
| <i>Begonia</i> sp. <sup>H, 35</sup>                         | Eurosids 1         | Extant   | 0.8  |
| <i>Beilschmiedia curviramea</i> <sup>T, 29</sup>            | Magnoliids         | Extant   | 4.7  |
| <i>Berberis aquifolium</i> <sup>T, 46</sup>                 | Basal eudicots     | Extant   | 7.1  |
| <i>Berberis nervosa</i> <sup>T, 46</sup>                    | Basal eudicots     | Extant   | 3.0  |
| <i>Bolbitis bernoullii</i> <sup>V, 40</sup>                 | Eupolypods 1       | Extant   | 0.6  |
| <i>Bolbitis nicotianifolia</i> <sup>H, 40</sup>             | Eupolypods 1       | Extant   | 0.9  |
| <i>Bolbitis pergamentacea</i> <sup>H, 40</sup>              | Eupolypods 1       | Extant   | 2.5  |
| <i>Bolbitis portoricensis</i> <sup>H</sup>                  | Eupolypods 1       | Extant   | 1.5  |
| <i>Bommeria Ehrenbergiana</i> <sup>H, 40</sup>              | Basal polypodiales | Extant   | 1.8  |
| <i>Botrychium virginianum</i> <sup>H, 40</sup>              | Ophioglossales     | Extant   | 1.2  |
| <i>Byrsonima crassifolia</i> <sup>T</sup>                   | Eurosids 1         | Extant   | 15.4 |
| C <sub>3</sub> bambus. & panicoids (5 sp.) <sup>H, 41</sup> | Monocot            | Extant   | 6.1  |
| C <sub>3</sub> festucoids (10 sp.) <sup>H, 41</sup>         | Monocot            | Extant   | 4.5  |
| C <sub>4</sub> NAD-ME (9 sp.) <sup>H, 41</sup>              | Monocot            | Extant   | 8.9  |

|                                                                   |                     |               |      |
|-------------------------------------------------------------------|---------------------|---------------|------|
| C4 NADP-ME (8 sp.) <sup>H, 41</sup>                               | Monocot             | Extant        | 14.3 |
| C4 PCK (9 sp.) <sup>H, 41</sup>                                   | Monocot             | Extant        | 8.7  |
| <i>Calophyllum brasiliense</i> <sup>T, 35</sup>                   | Eurosids 1          | Extant        | 5.6  |
| <i>Camptosorus rhizophyllus</i> <sup>H, 40</sup>                  | Eupolypods 2        | Extant        | 1.0  |
| <i>Campyloneurum aglaolepis</i> <sup>H, 40</sup>                  | Eupolypods 1        | Extant        | 1.3  |
| <i>Campyloneurum repens</i> <sup>H, 40</sup>                      | Eupolypods 1        | Extant        | 1.0  |
| <i>Castilla elastica</i> sub. <i>costaricana</i> <sup>T, 35</sup> | Eurosids 2          | Extant        | 5.8  |
| <i>Catalpa speciosa</i> <sup>T, 46</sup>                          | Euasterids 1        | Extant        | 6.9  |
| <i>Catalpa speciosa</i> <sup>T, 6</sup>                           | Euasterids 1        | Extant        | 9.3  |
| <i>Catalpa speciosa</i> <sup>T, NORTH, 48</sup>                   | Euasterids 1        | Extant        | 5.5  |
| <i>Catalpa speciosa</i> <sup>T, SHADE, 48</sup>                   | Euasterids 1        | Extant        | 5.0  |
| <i>Catalpa speciosa</i> <sup>T, SOUTH, 48</sup>                   | Euasterids 1        | Extant        | 6.0  |
| <i>Ceratonia siliqua</i> <sup>T, 6</sup>                          | Eurosids 1          | Extant        | 5.3  |
| <i>Ceratopteris pteroides</i> <sup>H, 40</sup>                    | Basal polypodiales  | Extant        | 1.0  |
| <i>Ceratozamia mexicana</i> <sup>T, 11</sup>                      | Cycadales           | Extant        | 1.4  |
| <i>Cercis canadensis</i> <sup>T, 46</sup>                         | Eurosids 1          | Extant        | 7.8  |
| <i>Cercis canadensis</i> <sup>T, 36</sup>                         | Eurosids 1          | Extant        | 8.7  |
| <i>Chaetocarpus schomburgkianus</i> <sup>T, 29</sup>              | Eurosids 1          | Extant        | 3.3  |
| <i>Cheiropleuria biscuspidis</i> <sup>H, 32</sup>                 | Gleicheniales       | Extant        | 5.5  |
| <i>Chenopodium album</i> <sup>H, 46</sup>                         | Basal core eudicots | Extant        | 6.4  |
| <i>Chimaphila umbellata</i> <sup>T, 46</sup>                      | Basal asterids      | Extant        | 3.6  |
| <i>Chloranthus erectus</i> <sup>T</sup>                           | Chloranthaceae      | Extant        | 2.0  |
| <i>Chloranthus japonicus</i> <sup>H</sup>                         | Chloranthaceae      | Extant        | 3.1  |
| <i>Chloranthus spicatus</i> <sup>H</sup>                          | Chloranthaceae      | Extant        | 3.4  |
| <i>Chloranthus spicatus</i> <sup>H</sup>                          | Chloranthaceae      | Extant        | 3.1  |
| <i>Chrysophyllum auratum</i> <sup>T, 29</sup>                     | Basal asterids      | Extant        | 4.5  |
| <i>Circaea lutetiana</i> <sup>H, 46</sup>                         | Basal rosids        | Extant        | 5.0  |
| <i>Citrus sinensis</i> <sup>T, 35</sup>                           | Eurosids 2          | Extant        | 3.1  |
| <i>Cladophlebis aktashensis</i> <sup>25</sup>                     | Leptosporangiate    | Jurassic      | 1.8  |
| <i>Clusia</i> sp. <sup>V, 35</sup>                                | Eurosids 1          | Extant        | 2.0  |
| <i>Cnemidaria nervosa</i> <sup>T, 40</sup>                        | Cyatheales          | Extant        | 0.9  |
| <i>Conceveiba guianensis</i> <sup>T, 29</sup>                     | Eurosids 1          | Extant        | 5.7  |
| <i>Convolvulus sepium</i> <sup>V, 6</sup>                         | Euasterids 1        | Extant        | 6.6  |
| <i>Coprosma baueri</i> <sup>T, 6</sup>                            | Euasterids 1        | Extant        | 5.6  |
| <i>Coprosma robusta</i> <sup>T, 6</sup>                           | Euasterids 1        | Extant        | 3.9  |
| <i>Cordaites angulosostriatus</i> <sup>17</sup>                   | Cordaitales         | Penns./Perm.  | 2.3  |
| <i>Cordaites borassifolius</i> <sup>17</sup>                      | Cordaitales         | Pennsylvanian | 2.5  |
| <i>Cordaites crassus</i> <sup>24</sup>                            | Cordaitales         | Pennsylvanian | 1.4  |
| <i>Cordaites felicis</i> <sup>24</sup>                            | Cordaitales         | Pennsylvanian | 1.8  |
| <i>Cordaites lingulatus</i> <sup>24</sup>                         | Cordaitales         | Penns./Perm.  | 1.7  |
| <i>Cordaites microstachys</i> <sup>17</sup>                       | Cordaitales         | Pennsylvanian | 3.5  |
| <i>Cordaites palmaeformis</i> <sup>17</sup>                       | Cordaitales         | Pennsylvanian | 4.0  |
| <i>Cordaites principalis</i> <sup>17</sup>                        | Cordaitales         | Penns./Perm.  | 2.6  |
| <i>Cordaites rhombinervis</i> <sup>24</sup>                       | Cordaitales         | Pennsylvanian | 2.5  |
| <i>Cordaites tenuistriatus</i> <sup>24</sup>                      | Cordaitales         | Pennsylvanian | 1.7  |
| <i>Cornus florida</i> <sup>T, 6</sup>                             | Basal asterids      | Extant        | 5.7  |

|                                                     |                     |               |      |
|-----------------------------------------------------|---------------------|---------------|------|
| <i>Corylus americana</i> <sup>T, 6</sup>            | Eurosids 1          | Extant        | 7.0  |
| <i>Corynepteris angustissima</i> <sup>12</sup>      | Zygopteridales      | Pennsylvanian | 2.4  |
| <i>Corynepteris coralloides</i> <sup>12</sup>       | Zygopteridales      | Pennsylvanian | 1.9  |
| <i>Corynepteris similes</i> <sup>12</sup>           | Zygopteridales      | Pennsylvanian | 1.6  |
| <i>Crassula ovata</i> <sup>T, 35</sup>              | Saxifragales        | Extant        | 0.4  |
| <i>Crataegus</i> sp. <sup>T, 46</sup>               | Eurosids 2          | Extant        | 9.9  |
| <i>Cretaegus</i> sp. <sup>T, 6</sup>                | Eurosids 2          | Extant        | 10.2 |
| <i>Ctenis biloba</i> <sup>5</sup>                   | Cycadales           | Triassic      | 2.1  |
| <i>Ctenis kaneharai</i> <sup>26</sup>               | Cycadales           | Jurassic      | 1.2  |
| <i>Ctenis sulcicaulis</i> <sup>26</sup>             | Cycadales           | Jurassic      | 1.5  |
| <i>Culcita coniiifolia</i> <sup>H, 40</sup>         | Cyatheales          | Extant        | 1.6  |
| <i>Curatela americana</i> <sup>T</sup>              | Basal core eudicots | Extant        | 16.2 |
| <i>Cyathocarpus hemitelioides</i> <sup>10</sup>     | Marattiales         | Pennsylvanian | 2.4  |
| <i>Dalbergia retusa</i> <sup>T</sup>                | Eurosids 1          | Extant        | 13.4 |
| <i>Danaea elliptica</i> <sup>H, 40</sup>            | Marattiales         | Extant        | 0.9  |
| <i>Danaea grandifolia</i> <sup>H, 40</sup>          | Marattiales         | Extant        | 1.5  |
| <i>Dicksonia kendalli</i> <sup>25</sup>             | Cyatheales          | Jurassic      | 3.8  |
| <i>Dicksonites plueckenetii</i> <sup>19</sup>       | Callistophytales    | Pennsylvanian | 2.8  |
| <i>Dicranopteris flexuosa</i> <sup>H, 40</sup>      | Gleicheniales       | Extant        | 3.8  |
| <i>Dicranopteris pectinata</i> <sup>H, 40</sup>     | Gleicheniales       | Extant        | 2.9  |
| <i>Dicroidium crassinervis</i> <sup>2, 5</sup>      | Umkomasiales        | Triassic      | 1.3  |
| <i>Dicroidium dubium</i> <sup>2, 5</sup>            | Umkomasiales        | Triassic      | 1.8  |
| <i>Dicroidium dutoitii</i> <sup>2, 5</sup>          | Umkomasiales        | Triassic      | 1.6  |
| <i>Dicroidium odontopteroides</i> <sup>2, 5</sup>   | Umkomasiales        | Triassic      | 1.6  |
| <i>Dicroidium zuberi</i> <sup>2, 5</sup>            | Umkomasiales        | Triassic      | 1.9  |
| <i>Dictyophyllum rugosum</i> <sup>25</sup>          | Gleicheniales       | Jurassic      | 4.4  |
| <i>Dioon edule</i> <sup>T, 11</sup>                 | Cycadales           | Extant        | 2.2  |
| <i>Dipteris conjugata</i> <sup>H</sup>              | Gleicheniales       | Extant        | 4.4  |
| <i>Dipteris conjugata</i> <sup>H, 32</sup>          | Gleicheniales       | Extant        | 5.6  |
| <i>Dipteryx panamensis</i> <sup>T, 35</sup>         | Eurosids 1          | Extant        | 5.5  |
| <i>Drynaria quercifolia</i> <sup>H, 32</sup>        | Eupolypods 1        | Extant        | 2.7  |
| <i>Drypetes variabilis</i> <sup>T, 29</sup>         | Eurosids 1          | Extant        | 4.9  |
| <i>Eboracia lobifolia</i> <sup>25</sup>             | Cyatheales          | Jurassic      | 3.1  |
| <i>Ecclinusa guianensis</i> <sup>T, 29</sup>        | Basal asterids      | Extant        | 6.3  |
| <i>Eddya sullivanensis</i> <sup>22</sup>            | Archaeopteridales   | Devonian      | 2.0  |
| <i>Eichhornia crassipes</i> <sup>H, 35</sup>        | Monocot             | Extant        | 4.2  |
| <i>Elaeocarpus dentatus</i> <sup>T, 6</sup>         | Eurosids 1          | Extant        | 5.7  |
| <i>Encephalartos lehmanii</i> <sup>T, 11</sup>      | Cycadales           | Extant        | 2.3  |
| <i>Eschweilera cf. trinitensis</i> <sup>T, 39</sup> | Basal asterids      | Extant        | 7.4  |
| <i>Eschweilera corrugata</i> <sup>T, 39</sup>       | Basal asterids      | Extant        | 8.3  |
| <i>Estcourtia bergvillensis</i> <sup>3</sup>        | Glossopteridales    | Permian       | 1.9  |
| <i>Estcourtia vandijkii</i> <sup>3</sup>            | Glossopteridales    | Permian       | 1.3  |
| <i>Eucalyptus globules</i> <sup>T</sup>             | Basal rosids        | Extant        | 9.4  |
| <i>Eucalyptus globules</i> <sup>T, 6</sup>          | Basal rosids        | Extant        | 5.3  |
| <i>Eupatorium urticaefolium</i> <sup>H, 46</sup>    | Euasterids 2        | Extant        | 3.9  |
| <i>Euphorbia milii</i> <sup>T, 35</sup>             | Eurosids 1          | Extant        | 2.2  |

|                                                    |                   |               |      |
|----------------------------------------------------|-------------------|---------------|------|
| <i>Evonymus sp.</i> <sup>T, 6</sup>                | Eurosids 1        | Extant        | 5.3  |
| <i>Fortopteris latifolia</i> <sup>19</sup>         | incertae sedis    | Pennsylvanian | 2.3  |
| <i>Fraxinus americana</i> <sup>T, NORTH, 48</sup>  | Euasterids 1      | Extant        | 7.9  |
| <i>Fraxinus americana</i> <sup>T, SHADE, 48</sup>  | Euasterids 1      | Extant        | 7.6  |
| <i>Fraxinus americana</i> <sup>T, SOUTH, 48</sup>  | Euasterids 1      | Extant        | 9.4  |
| <i>Gaultheria shallon</i> <sup>T, 46</sup>         | Basal asterids    | Extant        | 3.2  |
| <i>Genipa americana</i> <sup>T</sup>               | Euasterids 1      | Extant        | 10.6 |
| <i>Gigantopterid</i> Fig. 6.2 <sup>23</sup>        | Gigantopteridales | Permian       | 3.9  |
| <i>Gigantopterid</i> Fig. 8.1 <sup>23</sup>        | Gigantopteridales | Permian       | 2.3  |
| <i>Gigantopterid</i> Fig. 9.2 <sup>23</sup>        | Gigantopteridales | Permian       | 3.5  |
| <i>Gigantopterid</i> Fig. 14.1 <sup>23</sup>       | Gigantopteridales | Permian       | 2.3  |
| <i>Gigantopterid</i> Fig. 14.9 <sup>23</sup>       | Gigantopteridales | Permian       | 6.2  |
| <i>Gigantopterid</i> Fig. 14.10 <sup>23</sup>      | Gigantopteridales | Permian       | 2.0  |
| <i>Ginkgo biloba</i> <sup>T, SHADE</sup>           | Ginkgoales        | Extant        | 1.2  |
| <i>Ginkgo biloba</i> <sup>T, SUN</sup>             | Ginkgoales        | Extant        | 1.6  |
| <i>Ginkgo huttoni</i> <sup>28</sup>                | Ginkgoales        | Jurassic      | 2.0  |
| <i>Ginkgo longifolius</i> <sup>28</sup>            | Ginkgoales        | Jurassic      | 1.3  |
| <i>Ginkgoites aviamnica</i> <sup>4, 5</sup>        | Ginkgoales        | Triassic      | 0.7  |
| <i>Ginkgoites koningensis</i> <sup>4, 5</sup>      | Ginkgoales        | Triassic      | 2.4  |
| <i>Ginkgoites matatiensis</i> <sup>4, 5</sup>      | Ginkgoales        | Triassic      | 1.4  |
| <i>Ginkgoites muriselmata</i> <sup>4, 5</sup>      | Ginkgoales        | Triassic      | 1.0  |
| <i>Ginkgoites telemachus</i> <sup>4, 5</sup>       | Ginkgoales        | Triassic      | 0.9  |
| <i>Ginkgoites waldeckensis</i> <sup>4, 5</sup>     | Ginkgoales        | Triassic      | 1.7  |
| <i>Gleichenia squamosa</i> <sup>H, 40</sup>        | Gleicheniales     | Extant        | 2.6  |
| <i>Glossopteris loskopensis</i> <sup>3</sup>       | Glossopteridales  | Permian       | 2.9  |
| <i>Glossopteris symmetrifolia</i> <sup>3</sup>     | Glossopteridales  | Permian       | 2.2  |
| <i>Gnetum leyboldii</i> <sup>V, 38</sup>           | Gnetales          | Extant        | 5.9  |
| <i>Gnetum paniculatum</i> <sup>V, 38</sup>         | Gnetales          | Extant        | 7.4  |
| <i>Gnetum urens</i> <sup>V, 38</sup>               | Gnetales          | Extant        | 4.9  |
| <i>Gnetum venosum</i> <sup>V, 38</sup>             | Gnetales          | Extant        | 4.4  |
| <i>Griselinia littoralis</i> <sup>6</sup>          | Basal asterids    | Extant        | 4.9  |
| <i>Guzmania monostachia</i> <sup>H, 35</sup>       | Monocot           | Extant        | 2.2  |
| <i>Halleyoctenis brachypinnata</i> <sup>4, 5</sup> | Bennettitales     | Triassic      | 3.2  |
| <i>Halleyoctenis megapinnata</i> <sup>4, 5</sup>   | Bennettitales     | Triassic      | 4.6  |
| <i>Hedyosmum orientale</i> <sup>T</sup>            | Chloranthaceae    | Extant        | 1.6  |
| <i>Hedyosmum angustifolium</i> <sup>T, SHADE</sup> | Chloranthaceae    | Extant        | 3.5  |
| <i>Hedyosmum angustifolium</i> <sup>T, SUN</sup>   | Chloranthaceae    | Extant        | 3.8  |
| <i>Hedyosmum anisodorum</i> <sup>T</sup>           | Chloranthaceae    | Extant        | 3.8  |
| <i>Hedyosmum bonplandianum</i> <sup>T</sup>        | Chloranthaceae    | Extant        | 3.1  |
| <i>Hedyosmum brasilense</i> <sup>T, SHADE</sup>    | Chloranthaceae    | Extant        | 7.3  |
| <i>Hedyosmum brasilense</i> <sup>T, SUN</sup>      | Chloranthaceae    | Extant        | 5.8  |
| <i>Hedyosmum costaricens</i> <sup>T, SHADE</sup>   | Chloranthaceae    | Extant        | 2.8  |
| <i>Hedyosmum costaricens</i> <sup>T, SUN</sup>     | Chloranthaceae    | Extant        | 3.1  |
| <i>Hedyosmum cuatrecazanum</i> <sup>T, SHADE</sup> | Chloranthaceae    | Extant        | 4.0  |
| <i>Hedyosmum cuatrecazanum</i> <sup>T, SUN</sup>   | Chloranthaceae    | Extant        | 4.5  |
| <i>Hedyosmum glabra</i> <sup>T</sup>               | Chloranthaceae    | Extant        | 2.6  |

|                                                        |                    |               |      |
|--------------------------------------------------------|--------------------|---------------|------|
| <i>Hedyosmum goudotianum</i> <sup>T, SHADE</sup>       | Chloranthaceae     | Extant        | 2.9  |
| <i>Hedyosmum goudotianum</i> <sup>T, SUN</sup>         | Chloranthaceae     | Extant        | 4.1  |
| <i>Hedyosmum maximum</i> <sup>T, SHADE</sup>           | Chloranthaceae     | Extant        | 3.2  |
| <i>Hedyosmum maximum</i> <sup>T, SUN</sup>             | Chloranthaceae     | Extant        | 3.2  |
| <i>Hedyosmum mexicanum</i> <sup>T</sup>                | Chloranthaceae     | Extant        | 3.5  |
| <i>Hedyosmum orientale</i> <sup>T</sup>                | Chloranthaceae     | Extant        | 2.1  |
| <i>Hedyosmum peruvianum</i> <sup>T, SHADE</sup>        | Chloranthaceae     | Extant        | 3.2  |
| <i>Hedyosmum peruvianum</i> <sup>T, SUN</sup>          | Chloranthaceae     | Extant        | 4.7  |
| <i>Hedyosmum racemosum</i> <sup>T</sup>                | Chloranthaceae     | Extant        | 4.9  |
| <i>Hedyosmum scabrum</i> <sup>T, SHADE</sup>           | Chloranthaceae     | Extant        | 2.7  |
| <i>Hedyosmum scabrum</i> <sup>T, SUN</sup>             | Chloranthaceae     | Extant        | 3.3  |
| <i>Hedyosmum tono</i> <sup>T</sup>                     | Chloranthaceae     | Extant        | 3.4  |
| <i>Hedyosmum translucidum</i> <sup>T, SHADE</sup>      | Chloranthaceae     | Extant        | 2.7  |
| <i>Hedyosmum translucidum</i> <sup>T, SUN</sup>        | Chloranthaceae     | Extant        | 5.0  |
| <i>Helianthus grosseserratus</i> <sup>H, 6</sup>       | Euasterids 2       | Extant        | 9.0  |
| <i>Hemionitis elegans</i> <sup>H, 40</sup>             | Basal polypodiales | Extant        | 1.4  |
| <i>Hemionitis palmata</i> <sup>H, 40</sup>             | Basal polypodiales | Extant        | 1.5  |
| <i>Hemionitis rufa</i> <sup>H, 40</sup>                | Basal polypodiales | Extant        | 1.1  |
| <i>Hernandia didymantha</i> <sup>T, 35</sup>           | Magnoliids         | Extant        | 3.5  |
| <i>Hieronyma laxifolia</i> <sup>T, 29</sup>            | Eurosids 1         | Extant        | 8.1  |
| <i>Hirsutum acaderens</i> <sup>3</sup>                 | Glossopteridales   | Permian       | 2.9  |
| <i>Hirsutum dutoitides</i> <sup>3</sup>                | Glossopteridales   | Permian       | 2.0  |
| <i>Hirsutum intermittens</i> <sup>3</sup>              | Glossopteridales   | Permian       | 1.7  |
| <i>Hirsutum leslii</i> <sup>3</sup>                    | Glossopteridales   | Permian       | 2.6  |
| <i>Hoya carnosa</i> <sup>V, 35</sup>                   | Euasterids 1       | Extant        | 1.0  |
| <i>Humulus lupulus</i> <sup>V, 6</sup>                 | Eurosids 2         | Extant        | 7.2  |
| <i>Hymenophyllites quadryidactylites</i> <sup>12</sup> | Leptosporangiate   | Pennsylvanian | 3.3  |
| <i>Hyparrhenia rufa</i> <sup>H</sup>                   | Monocot            | Extant        | 11.3 |
| <i>Hypoderris brownii</i> <sup>H, 40</sup>             | Eupolypods 1       | Extant        | 0.9  |
| <i>Illicium floridanum</i> <sup>T</sup>                | Basal angiosperms  | Extant        | 4.9  |
| <i>Illicium parviflorum</i> <sup>T, SHADE</sup>        | Basal angiosperms  | Extant        | 5.5  |
| <i>Illicium parviflorum</i> <sup>T, SUN</sup>          | Basal angiosperms  | Extant        | 5.7  |
| <i>Impatiens biflora</i> <sup>H, 6</sup>               | Basal asterids     | Extant        | 5.4  |
| <i>Iva xanthifolia</i> <sup>H, 46</sup>                | Euasterids 2       | Extant        | 13.3 |
| <i>Juglans nigra</i> <sup>T, 46</sup>                  | Eurosids 1         | Extant        | 5.4  |
| <i>Juglans nigra</i> <sup>T, 6</sup>                   | Eurosids 1         | Extant        | 7.0  |
| <i>Kadsura longipedunculata</i> <sup>V</sup>           | Basal angiosperms  | Extant        | 5.0  |
| <i>Kalanchoe sp.</i> <sup>H, 35</sup>                  | Saxifragales       | Extant        | 0.8  |
| <i>Karinopteris robusta</i> <sup>8</sup>               | incertae sedis     | Pennsylvanian | 2.3  |
| <i>Kylikipteris arguta</i> <sup>25</sup>               | Cyatheales         | Jurassic      | 2.1  |
| <i>Lanceolatus lerouxides</i> <sup>3</sup>             | Glossopteridales   | Permian       | 1.8  |
| <i>Lanceolatus strictus</i> <sup>3</sup>               | Glossopteridales   | Permian       | 1.6  |
| <i>Laurus nobilis</i> <sup>T</sup>                     | Magnoliids         | Extant        | 4.7  |
| <i>Laveinopteris loshii</i> <sup>33</sup>              | Medullosales       | Pennsylvanian | 2.9  |
| <i>Laveinopteris rarinervis</i> <sup>33</sup>          | incertae sedis     | Pennsylvanian | 2.8  |
| <i>Laveinopteris tenuifolia</i> <sup>33</sup>          | incertae sedis     | Pennsylvanian | 3.3  |

|                                                        |                     |               |      |
|--------------------------------------------------------|---------------------|---------------|------|
| <i>Linopteris bunburii</i> <sup>16</sup>               | incertae sedis      | Pennsylvanian | 2.7  |
| <i>Linopteris neuropteroides</i> <sup>33</sup>         | incertae sedis      | Pennsylvanian | 5.1  |
| <i>Linopteris subbrongniartii</i> <sup>33</sup>        | Medullosales        | Pennsylvanian | 4.1  |
| <i>Liquidamber styraciflua</i> <sup>T, NORTH, 48</sup> | Saxifragales        | Extant        | 8.2  |
| <i>Liquidamber styraciflua</i> <sup>T, SHADE, 48</sup> | Saxifragales        | Extant        | 6.9  |
| <i>Liquidamber styraciflua</i> <sup>T, SOUTH, 48</sup> | Saxifragales        | Extant        | 9.3  |
| <i>Liriodendron tulipifera</i> <sup>T, 36</sup>        | Magnoliids          | Extant        | 7.6  |
| <i>Liriodendron tulipifera</i> <sup>T, 35</sup>        | Magnoliids          | Extant        | 6.5  |
| <i>Lobopteris micromiltoni</i> <sup>43</sup>           | Marattiales         | Pennsylvanian | 2.7  |
| <i>Lonchopteris eschweileri</i> <sup>13</sup>          | incertae sedis      | Pennsylvanian | 2.8  |
| <i>Lonchopteris petiti</i> <sup>13</sup>               | incertae sedis      | Pennsylvanian | 5.0  |
| <i>Lonchopteris rugosa</i> <sup>13</sup>               | Medullosales        | Pennsylvanian | 2.9  |
| <i>Lonicera tatarica</i> <sup>T, NORTH, 48</sup>       | Euasterids 2        | Extant        | 7.9  |
| <i>Lonicera tatarica</i> <sup>T, SHADE, 48</sup>       | Euasterids 2        | Extant        | 7.5  |
| <i>Lonicera tatarica</i> <sup>T, SOUTH, 48</sup>       | Euasterids 2        | Extant        | 9.7  |
| <i>Lonicera hispidula</i> <sup>V, 46</sup>             | Euasterids 2        | Extant        | 10.5 |
| <i>Lycopersicon esculentum</i> <sup>H, 46</sup>        | Euasterids 1        | Extant        | 7.1  |
| <i>Lyginopteris baumleri</i> <sup>31</sup>             | Lyginopteridales    | Pennsylvanian | 2.9  |
| <i>Lyginopteris hoeninghausii</i> <sup>31</sup>        | Lyginopteridales    | Pennsylvanian | 4.1  |
| <i>Lygodium heterodoxum</i> <sup>V, 40</sup>           | Schizaeales         | Extant        | 1.0  |
| <i>Lygodium radiatum</i> <sup>V, 40</sup>              | Schizaeales         | Extant        | 0.8  |
| <i>Lygodium venustum</i> <sup>V</sup>                  | Schizaeales         | Extant        | 2.8  |
| <i>Mabea taquiri</i> <sup>T, 29</sup>                  | Eurosids 1          | Extant        | 7.4  |
| <i>Macroneuropteris macrophylla</i> <sup>16</sup>      | incertae sedis      | Pennsylvanian | 2.8  |
| <i>Macroneuropteris scheuchzeri</i> <sup>16</sup>      | Medullosales        | Pennsylvanian | 3.4  |
| <i>Macrozamia moorei</i> <sup>T, 11</sup>              | Cycadales           | Extant        | 2    |
| <i>Manilkara bidentata</i> <sup>T, 29</sup>            | Basal asterids      | Extant        | 6.3  |
| <i>Marattia anglica</i> <sup>25</sup>                  | Marattiales         | Jurassic      | 1.2  |
| <i>Marattia laevis</i> <sup>H, 40</sup>                | Marattiales         | Extant        | 1.0  |
| <i>Margaritopteris conwayi</i> <sup>34</sup>           | Lyginopteridales    | Pennsylvanian | 2.7  |
| <i>Mariopteris hirsuta</i> <sup>19</sup>               | incertae sedis      | Pennsylvanian | 3.5  |
| <i>Mariopteris hirta</i> <sup>19</sup>                 | incertae sedis      | Pennsylvanian | 1.8  |
| <i>Mariopteris lobatifolia</i> <sup>19</sup>           | incertae sedis      | Pennsylvanian | 2.4  |
| <i>Mariopteris muricata</i> <sup>8</sup>               | incertae sedis      | Pennsylvanian | 2.3  |
| <i>Mariopteris nervosa</i> <sup>8</sup>                | incertae sedis      | Pennsylvanian | 2.3  |
| <i>Mariopteris sauveurii</i> <sup>8</sup>              | incertae sedis      | Pennsylvanian | 1.6  |
| <i>Matonidium goepperti</i> <sup>25</sup>              | Gleicheniales       | Jurassic      | 3.2  |
| <i>Matteuccia struthiopteris</i> <sup>H, 40</sup>      | Eupolypods 2        | Extant        | 1.3  |
| <i>Meryta sinclairii</i> <sup>T, 6</sup>               | Euasterids 2        | Extant        | 3.6  |
| <i>Metaxya rostrata</i> <sup>H, 40</sup>               | Cyatheales          | Extant        | 1.3  |
| <i>Metrosideros tomentosa</i> <sup>T, 6</sup>          | Basal rosids        | Extant        | 5.8  |
| <i>Microcycas calocoma</i> <sup>T, 11</sup>            | Cycadales           | Extant        | 2.4  |
| <i>Mirabilis nyctagineus</i> <sup>H, 46</sup>          | Basal core eudicots | Extant        | 6.5  |
| <i>Morus alba</i> <sup>T, 47</sup>                     | Eurosids 2          | Extant        | 11.2 |
| <i>Morus alba</i> <sup>T, 6</sup>                      | Eurosids 2          | Extant        | 13.3 |
| <i>Nageia nagi</i> <sup>T</sup>                        | Coniferales         | Extant        | 1.8  |

|                                                     |                    |               |     |
|-----------------------------------------------------|--------------------|---------------|-----|
| <i>Nectandra grandis</i> <sup>T, 29</sup>           | Magnoliids         | Extant        | 5.9 |
| <i>Neuralethopteris jongmansii</i> <sup>33</sup>    | Medullosales       | Pennsylvanian | 4.4 |
| <i>Neuralethopteris rectinervis</i> <sup>33</sup>   | Medullosales       | Pennsylvanian | 5.1 |
| <i>Neuralethopteris schlehanii</i> <sup>33</sup>    | Medullosales       | Pennsylvanian | 3.4 |
| <i>Neurocallis praestantissima</i> <sup>H, 40</sup> | Basal polypodiales | Extant        | 1.1 |
| <i>Neurodium lanceolatum</i> <sup>H, 40</sup>       | Eupolypods 1       | Extant        | 2.7 |
| <i>Neuropteris dussartii</i> <sup>33</sup>          | incertae sedis     | Pennsylvanian | 2.8 |
| <i>Neuropteris flexuosa</i> <sup>16</sup>           | incertae sedis     | Pennsylvanian | 2.9 |
| <i>Neuropteris heterophylla</i> <sup>33</sup>       | Medullosales       | Pennsylvanian | 3.9 |
| <i>Neuropteris hollandica</i> <sup>33</sup>         | incertae sedis     | Pennsylvanian | 3.5 |
| <i>Neuropteris oblique</i> <sup>33</sup>            | Medullosales       | Pennsylvanian | 3.7 |
| <i>Neuropteris ovata</i> <sup>33</sup>              | incertae sedis     | Pennsylvanian | 4.5 |
| <i>Nicotiana alata</i> <sup>H, 46</sup>             | Euasterids 1       | Extant        | 7.4 |
| <i>Nicotiana tabacum</i> <sup>H, 7</sup>            | Euasterids 1       | Extant        | 5.4 |
| <i>Nilssonia compta</i> <sup>26</sup>               | Cycadales          | Jurassic      | 1.7 |
| <i>Nilssonia kendalli</i> <sup>26</sup>             | Cycadales          | Jurassic      | 2.2 |
| <i>Nilssonia tenuicaulis</i> <sup>26</sup>          | Cycadales          | Jurassic      | 2.5 |
| <i>Nilssonia tenuinervis</i> <sup>26</sup>          | Cycadales          | Jurassic      | 3.5 |
| <i>Nilssoniopteris major</i> <sup>27</sup>          | Bennettitales      | Jurassic      | 2.1 |
| <i>Nilssoniopteris vittata</i> <sup>27</sup>        | Bennettitales      | Jurassic      | 2.7 |
| <i>Niphidium crassifolium</i> <sup>H, 40</sup>      | Eupolypods 1       | Extant        | 1.1 |
| <i>Noeggerathia chalaridii</i> <sup>9</sup>         | Noeggerathiales    | Pennsylvanian | 3.9 |
| <i>Noeggerathia foliosa</i> <sup>9</sup>            | Noeggerathiales    | Pennsylvanian | 2.5 |
| <i>Nothofagus alpina</i> <sup>T, 35</sup>           | Eurosids 1         | Extant        | 4.5 |
| <i>Nothofagus dombeyi</i> <sup>T, 35</sup>          | Eurosids 1         | Extant        | 5.8 |
| <i>Nuphar polysepalum</i> <sup>H</sup>              | Basal angiosperms  | Extant        | 5.9 |
| <i>Ocotea duotincta</i> <sup>T, 29</sup>            | Magnoliids         | Extant        | 4.4 |
| <i>Ocotea maritiana</i> <sup>T, 29</sup>            | Magnoliids         | Extant        | 6.6 |
| <i>Ocotea nicaraguensis</i> <sup>T, 29</sup>        | Magnoliids         | Extant        | 5.3 |
| <i>Ocotea subalveolata</i> <sup>T, 29</sup>         | Magnoliids         | Extant        | 5.4 |
| <i>Odontosoria clavata</i> <sup>H, 40</sup>         | Basal polypodiales | Extant        | 2.8 |
| <i>Oenothera biennis</i> <sup>H, 6</sup>            | Basal rosids       | Extant        | 6.6 |
| <i>Oligocarpia brongniartii</i> <sup>12</sup>       | Basal filicales    | Pennsylvanian | 2.2 |
| <i>Oligocarpia gutbieri</i> <sup>12</sup>           | Basal filicales    | Pennsylvanian | 2.5 |
| <i>Onoclea sensibilis</i> <sup>H, 40</sup>          | Eupolypods 2       | Extant        | 2.0 |
| <i>Ophioglossum engelmannii</i> <sup>H, 40</sup>    | Ophioglossales     | Extant        | 2.0 |
| <i>Ophioglossum palmatum</i> <sup>H, 40</sup>       | Ophioglossales     | Extant        | 1.5 |
| <i>Ophioglossum reticulatum</i> <sup>H, 40</sup>    | Ophioglossales     | Extant        | 1.4 |
| <i>Osmunda regalis</i> <sup>H, 40</sup>             | Osmundales         | Extant        | 2.0 |
| <i>Otozamites beani</i> <sup>27</sup>               | Bennettitales      | Jurassic      | 3.5 |
| <i>Otozamites gramineus</i> <sup>27</sup>           | Bennettitales      | Jurassic      | 3.9 |
| <i>Otozamites tenuatus</i> <sup>27</sup>            | Bennettitales      | Jurassic      | 5.4 |
| <i>Ottokaria buriadica</i> <sup>3</sup>             | Glossopteridales   | Permian       | 2.0 |
| <i>Ottokaria ferrugistratum</i> <sup>3</sup>        | Glossopteridales   | Permian       | 2.0 |
| <i>Ottokaria hammanskraalensis</i> <sup>3</sup>     | Glossopteridales   | Permian       | 2.3 |
| <i>Ottokaria transvaalensis</i> <sup>3</sup>        | Glossopteridales   | Permian       | 1.9 |



|                                                     |                     |               |      |
|-----------------------------------------------------|---------------------|---------------|------|
| <i>Palaeovittaria goedeboopensis</i> <sup>3</sup>   | Glossopteridales    | Permian       | 2.1  |
| <i>Palaeovittaria kurzii</i> <sup>3</sup>           | Glossopteridales    | Permian       | 2.0  |
| <i>Panax arboreum</i> <sup>T, 6</sup>               | Euasterids 2        | Extant        | 3.8  |
| <i>Paripteris gigantea</i> <sup>33</sup>            | Medullosales        | Pennsylvanian | 3.6  |
| <i>Paripteris linguaefolia</i> <sup>33</sup>        | Medullosales        | Pennsylvanian | 3.8  |
| <i>Parthenocissus quinquefolia</i> <sup>V, 46</sup> | Basal rosids        | Extant        | 6.1  |
| <i>Passiflora</i> sp. <sup>V, 35</sup>              | Eurosids 1          | Extant        | 1.2  |
| <i>Pausandra flagellorhachis</i> <sup>T, 29</sup>   | Eurosids 1          | Extant        | 1.6  |
| <i>Pecopteris bourozi</i> <sup>18</sup>             | incertae sedis      | Pennsylvanian | 3.4  |
| <i>Pecopteris bucklandii</i> <sup>31</sup>          | incertae sedis      | Pennsylvanian | 2.6  |
| <i>Pecopteris plumosa</i> <sup>18</sup>             | incertae sedis      | Pennsylvanian | 1.7  |
| <i>Pecopteris unita</i> <sup>10</sup>               | Marattiales         | Pennsylvanian | 0.5  |
| <i>Pecopteris volkmannii</i> <sup>18</sup>          | incertae sedis      | Pennsylvanian | 2.5  |
| <i>Pera schomburgkiana</i> <sup>T, 29</sup>         | Eurosids 1          | Extant        | 6.4  |
| <i>Phalaenopsis</i> sp. <sup>H, 35</sup>            | Monocot             | Extant        | 0.7  |
| <i>Pharus lappulacius</i> <sup>H</sup>              | Monocot             | Extant        | 2.9  |
| <i>Phlebopteris polypodoides</i> <sup>25</sup>      | Gleicheniales       | Jurassic      | 2.0  |
| <i>Photinia arbutifolia</i> <sup>T, 46</sup>        | Eurosids 2          | Extant        | 6.8  |
| <i>Photinia arbutifolia</i> <sup>T, 6</sup>         | Eurosids 2          | Extant        | 13.3 |
| <i>Phyllocladus aspleniifolius</i> <sup>T</sup>     | Coniferales         | Extant        | 2.1  |
| <i>Piranhea longepedunculata</i> <sup>T, 29</sup>   | Eurosids 1          | Extant        | 10.8 |
| <i>Plantago major</i> <sup>H, 46</sup>              | Euasterids 1        | Extant        | 3.8  |
| <i>Platanus occidentalis</i> <sup>T, 46</sup>       | Basal eudicots      | Extant        | 13.5 |
| <i>Platanus occidentalis</i> <sup>T, 6</sup>        | Basal eudicots      | Extant        | 12.7 |
| <i>Plumsteadia gibbosa</i> <sup>3</sup>             | Glossopteridales    | Permian       | 1.7  |
| <i>Plumsteadia natalensis</i> <sup>3</sup>          | Glossopteridales    | Permian       | 3.4  |
| <i>Pogonogphora sagotii</i> <sup>T, 29</sup>        | Eurosids 1          | Extant        | 7.1  |
| <i>Polygonum pennsylvanicum</i> <sup>H, 46</sup>    | Basal core eudicots | Extant        | 8.3  |
| <i>Polypodium triseriale</i> <sup>H</sup>           | Eupolypods 1        | Extant        | 1.0  |
| <i>Populus canadensis</i> <sup>T, 46</sup>          | Eurosids 1          | Extant        | 15.4 |
| <i>Populus deltoides</i> <sup>T, 46</sup>           | Eurosids 1          | Extant        | 14.8 |
| <i>Populus deltoides</i> <sup>T, 6</sup>            | Eurosids 1          | Extant        | 15.3 |
| <i>Populus grandidentata</i> <sup>T, 46</sup>       | Eurosids 1          | Extant        | 9.0  |
| <i>Populus nigra</i> <sup>T</sup>                   | Eurosids 1          | Extant        | 23.3 |
| <i>Pouteria anibaefolia</i> <sup>T, 29</sup>        | Basal asterids      | Extant        | 10.3 |
| <i>Pouteria calistophylla</i> <sup>T, 35</sup>      | Basal asterids      | Extant        | 7.2  |
| <i>Pouteria egregia</i> <sup>T, 29</sup>            | Basal asterids      | Extant        | 9.4  |
| <i>Pouteria trilocularis</i> <sup>T, 29</sup>       | Basal asterids      | Extant        | 4.9  |
| <i>Pouteria venosa</i> <sup>T, 29</sup>             | Basal asterids      | Extant        | 8.3  |
| <i>Prunus cerasus</i> <sup>T, 6</sup>               | Eurosids 2          | Extant        | 9.6  |
| <i>Prunus persica</i> <sup>T, 6</sup>               | Eurosids 2          | Extant        | 11.4 |
| <i>Prunus serotina</i> <sup>T, NORTH, 48</sup>      | Eurosids 2          | Extant        | 10.2 |
| <i>Prunus serotina</i> <sup>T, SHADE, 48</sup>      | Eurosids 2          | Extant        | 7.2  |
| <i>Prunus serotina</i> <sup>T, SOUTH, 48</sup>      | Eurosids 2          | Extant        | 11.1 |
| <i>Pseudoctenis fissa</i> <sup>4, 5</sup>           | Cycadales           | Triassic      | 1.1  |
| <i>Pseudoctenis gracipinnata</i> <sup>4, 5</sup>    | Cycadales           | Triassic      | 1.4  |

|                                                   |                    |          |      |
|---------------------------------------------------|--------------------|----------|------|
| <i>Pseudoctenis harringtoniana</i> <sup>4,5</sup> | Cycadales          | Triassic | 1.6  |
| <i>Pseudoctenis longipinnata</i> <sup>4,5</sup>   | Cycadales          | Triassic | 2.2  |
| <i>Pseudoctenis oleosa</i> <sup>26</sup>          | Cycadales          | Jurassic | 1.0  |
| <i>Pseudoctenis sanipassiensis</i> <sup>4,5</sup> | Cycadales          | Triassic | 1.3  |
| <i>Pseudoctenis spatulata</i> <sup>4,5</sup>      | Cycadales          | Triassic | 1.5  |
| <i>Pseudopanax crassifolium</i> <sup>T,6</sup>    | Euasterids 2       | Extant   | 5.6  |
| <i>Pteris altissima</i> <sup>H</sup>              | Basal polypodiales | Extant   | 1.8  |
| <i>Pteris biaurita</i> <sup>H,40</sup>            | Basal polypodiales | Extant   | 2.2  |
| <i>Pteris grandifolia</i> <sup>H,40</sup>         | Basal polypodiales | Extant   | 1.0  |
| <i>Pteris horizontalis</i> <sup>H,40</sup>        | Basal polypodiales | Extant   | 1.6  |
| <i>Pteris semiadnata</i> <sup>H,40</sup>          | Basal polypodiales | Extant   | 1.1  |
| <i>Pteris splendens</i> <sup>H,40</sup>           | Basal polypodiales | Extant   | 2.3  |
| <i>Pterozonium terrestre</i> <sup>H,40</sup>      | Basal polypodiales | Extant   | 0.7  |
| <i>Ptilophyllum hirsutum</i> <sup>27</sup>        | Bennettitales      | Jurassic | 2.9  |
| <i>Ptilophyllum pectinoides</i> <sup>27</sup>     | Bennettitales      | Jurassic | 2.7  |
| <i>Ptilophyllum</i> sp. <sup>4</sup>              | Bennettitales      | Triassic | 2.1  |
| <i>Pyrus ioensis</i> <sup>T,46</sup>              | Eurosids 2         | Extant   | 9.0  |
| <i>Pyrus ioensis</i> <sup>T,6</sup>               | Eurosids 2         | Extant   | 9.8  |
| <i>Quercus agrifolia</i> <sup>T,46</sup>          | Eurosids 1         | Extant   | 8.5  |
| <i>Quercus agrifolia</i> <sup>T,6</sup>           | Eurosids 1         | Extant   | 6.6  |
| <i>Quercus alba</i> <sup>T,6</sup>                | Eurosids 1         | Extant   | 10.5 |
| <i>Quercus douglasii</i> <sup>T,46</sup>          | Eurosids 1         | Extant   | 11.6 |
| <i>Quercus douglasii</i> <sup>T,6</sup>           | Eurosids 1         | Extant   | 5.3  |
| <i>Quercus dumosa</i> <sup>T,46</sup>             | Eurosids 1         | Extant   | 11.1 |
| <i>Quercus macrocarpa</i> <sup>T,47</sup>         | Eurosids 1         | Extant   | 9.7  |
| <i>Quercus macrocarpa</i> <sup>T,46</sup>         | Eurosids 1         | Extant   | 12.2 |
| <i>Quercus macrocarpa</i> <sup>T,NORTH,48</sup>   | Eurosids 1         | Extant   | 8.8  |
| <i>Quercus macrocarpa</i> <sup>T,SHADE,48</sup>   | Eurosids 1         | Extant   | 8.1  |
| <i>Quercus macrocarpa</i> <sup>T,SOUTH,48</sup>   | Eurosids 1         | Extant   | 14.1 |
| <i>Quercus rubra</i> <sup>T,35</sup>              | Eurosids 1         | Extant   | 8.8  |
| <i>Quercus velutina</i> <sup>T,46</sup>           | Eurosids 1         | Extant   | 11.5 |
| <i>Quercus velutina</i> <sup>T,NORTH,48</sup>     | Eurosids 1         | Extant   | 13.0 |
| <i>Quercus velutina</i> <sup>T,SHADE,48</sup>     | Eurosids 1         | Extant   | 8.2  |
| <i>Quercus velutina</i> <sup>T,SOUTH,48</sup>     | Eurosids 1         | Extant   | 14.1 |
| <i>Raphiolepis umbellata</i> <sup>T,6</sup>       | Eurosids 2         | Extant   | 3.8  |
| <i>Ratibida pinnata</i> <sup>H,6</sup>            | Euasterids 2       | Extant   | 7.1  |
| <i>Rhachiphyllum schenkii</i> <sup>30</sup>       | Peltaspermales     | Permian  | 1.3  |
| <i>Rhamnus californica</i> <sup>T,46</sup>        | Eurosids 2         | Extant   | 14.9 |
| <i>Rhamnus californica</i> <sup>T,6</sup>         | Eurosids 2         | Extant   | 12.1 |
| <i>Rhamnus crocea</i> <sup>T,46</sup>             | Eurosids 2         | Extant   | 8.5  |
| <i>Rhamnus purshiana</i> <sup>T,46</sup>          | Eurosids 2         | Extant   | 11.8 |
| <i>Rhedera trinervis</i> <sup>T</sup>             | Euasterids 1       | Extant   | 11.1 |
| <i>Rhizophora mangle</i> <sup>T,35</sup>          | Eurosids 1         | Extant   | 3.6  |
| <i>Rhus glabra</i> <sup>T,46</sup>                | Eurosids 2         | Extant   | 12.1 |
| <i>Rhus integrifolia</i> <sup>T,46</sup>          | Eurosids 2         | Extant   | 15.2 |
| <i>Rhus integrifolia</i> <sup>T,6</sup>           | Eurosids 2         | Extant   | 8.8  |

|                                                      |                       |               |      |
|------------------------------------------------------|-----------------------|---------------|------|
| <i>Rhus laurina</i> <sup>T, 46</sup>                 | Eurosids 2            | Extant        | 13.2 |
| <i>Ricinus communis</i> <sup>H, 47</sup>             | Eurosids 1            | Extant        | 11.8 |
| <i>Ricinus communis</i> <sup>H, 46</sup>             | Eurosids 1            | Extant        | 15.6 |
| <i>Rigbya arberioides</i> <sup>3</sup>               | Glossopteridales      | Permian       | 2.2  |
| <i>Robinia pseudoacacia</i> <sup>T, 46</sup>         | Eurosids 1            | Extant        | 16.7 |
| <i>Rubus australis</i> <sup>V, 6</sup>               | Eurosids 2            | Extant        | 4.9  |
| <i>Sagenopteris colpodes</i> large <sup>26, 42</sup> | Caytoniales           | Jurassic      | 0.7  |
| <i>Sagenopteris colpodes</i> small <sup>26, 42</sup> | Caytoniales           | Jurassic      | 1.2  |
| <i>Sagenopteris phillipsi</i> <sup>26</sup>          | Caytoniales           | Jurassic      | 2.3  |
| <i>Salix scouleriana</i> <sup>T, 46</sup>            | Eurosids 1            | Extant        | 10.5 |
| <i>Salvia mellifera</i> <sup>T, 46</sup>             | Euasterids 1          | Extant        | 13.3 |
| <i>Sambucus canadensis</i> <sup>T, 46</sup>          | Euasterids 2          | Extant        | 5.7  |
| <i>Sapium</i> sp. <sup>T, 29</sup>                   | Eurosids 1            | Extant        | 6.1  |
| <i>Sarcandra glabra</i> <sup>T</sup>                 | Chloranthaceae        | Extant        | 2.4  |
| <i>Sarcandra glabra</i> <sup>T</sup>                 | Chloranthaceae        | Extant        | 2.7  |
| <i>Schisandra glabra</i> <sup>V</sup>                | Basal angiosperms     | Extant        | 2.6  |
| <i>Silene stellata</i> <sup>H, 6</sup>               | Basal core eudicots   | Extant        | 5.3  |
| <i>Silphium integrifolium</i> <sup>H, 6</sup>        | Euasterids 2          | Extant        | 9.3  |
| <i>Silphium perfoliatum</i> <sup>H, 46</sup>         | Euasterids 2          | Extant        | 5.5  |
| <i>Simarouba glauca</i> <sup>T</sup>                 | Eurosids 2            | Extant        | 14.8 |
| <i>Simira maxonii</i> <sup>T, 35</sup>               | Euasterids 1          | Extant        | 6.8  |
| <i>Solanum tuberosum</i> <sup>H, 46</sup>            | Euasterids 1          | Extant        | 8.3  |
| <i>Solidago rigida</i> <sup>H, 46</sup>              | Euasterids 2          | Extant        | 13.2 |
| <i>Solidago rigida</i> <sup>H, 6</sup>               | Euasterids 2          | Extant        | 13.5 |
| <i>Sphaeropteris bradei</i> <sup>T, 40</sup>         | Cyatheales            | Extant        | 0.9  |
| <i>Sphaeropteris dissimilis</i> <sup>T, 40</sup>     | Cyatheales            | Extant        | 0.7  |
| <i>Sphenobaiera gyron</i> <sup>28</sup>              | Ginkgoales            | Jurassic      | 1.0  |
| <i>Sphenophyllum angustifolium</i> <sup>1</sup>      | Sphenophyllales       | Penns./Perm.  | 2.7  |
| <i>Sphenophyllum cuneifolium</i> <sup>1</sup>        | Sphenophyllales       | Pennsylvanian | 2.7  |
| <i>Sphenophyllum emarginatum</i> <sup>1</sup>        | Sphenophyllales       | Pennsylvanian | 2.7  |
| <i>Sphenophyllum gilmorei</i> <sup>1</sup>           | Sphenophyllales       | Pennsylvanian | 3.4  |
| <i>Sphenophyllum longifolium</i> <sup>1</sup>        | Sphenophyllales       | Pennsylvanian | 1.2  |
| <i>Sphenophyllum majus</i> <sup>1</sup>              | Sphenophyllales       | Penns./Perm.  | 1.8  |
| <i>Sphenophyllum oblongifolium</i> <sup>1</sup>      | Sphenophyllales       | Penns./Perm.  | 2.1  |
| <i>Sphenophyllum obovatum</i> <sup>1</sup>           | Sphenophyllales       | Permian       | 2.1  |
| <i>Sphenophyllum tenue</i> <sup>1</sup>              | Sphenophyllales       | Pennsylvanian | 1.3  |
| <i>Sphenophyllum tenuifolium</i> <sup>1</sup>        | Sphenophyllales       | Pennsylvanian | 2.2  |
| <i>Sphenophyllum thoni</i> <sup>1</sup>              | Sphenophyllales       | Pennsylvanian | 1.1  |
| <i>Sphenophyllum verticellatum</i> <sup>1</sup>      | Sphenophyllales       | Pennsylvanian | 2.6  |
| <i>Sphenopteris sewardii</i> <sup>12</sup>           | incertae sedis        | Pennsylvanian | 2.1  |
| <i>Stangeria pumila</i> <sup>H, 11</sup>             | Cycadales             | Extant        | 1.7  |
| <i>Sterculia pruriens</i> <sup>T, 39</sup>           | Eurosids 2            | Extant        | 14.3 |
| <i>Sterculia recordiana</i> <sup>T, 35</sup>         | Eurosids 2            | Extant        | 7.7  |
| <i>Sturia amoena</i> <sup>12</sup>                   | Leptosporangiate fern | Pennsylvanian | 2.6  |
| <i>Supaia thinnfeldioides</i> <sup>20</sup>          | Peltaspermales        | Permian       | 2.0  |
| <i>Swartzia simplex</i> <sup>T, 35</sup>             | Eurosids 1            | Extant        | 6.3  |

|                                                     |                   |          |      |
|-----------------------------------------------------|-------------------|----------|------|
| <i>Syringa vulgaris</i> <sup>T, 46</sup>            | Euasterids 1      | Extant   | 9.5  |
| <i>Syringa vulgaris</i> <sup>T, 6</sup>             | Euasterids 1      | Extant   | 10.9 |
| <i>Taeniopteris cetilocus</i> <sup>5</sup>          | incertae sedis    | Triassic | 1.1  |
| <i>Taeniopteris homerifolius</i> <sup>5</sup>       | incertae sedis    | Triassic | 1.1  |
| <i>Taeniopteris parvilocus</i> <sup>5</sup>         | incertae sedis    | Triassic | 1.8  |
| <i>Taeniopteris yabeiformis</i> <sup>5</sup>        | incertae sedis    | Triassic | 1.1  |
| <i>Taraxacum officinale</i> <sup>H, 6</sup>         | Euasterids 2      | Extant   | 8.6  |
| <i>Tectaria confluens</i> <sup>H</sup>              | Eupolypods 1      | Extant   | 1.3  |
| <i>Tectaria draconoptera</i> <sup>H, 40</sup>       | Eupolypods 1      | Extant   | 1.1  |
| <i>Tectaria heracleifolia</i> <sup>H, 40</sup>      | Eupolypods 1      | Extant   | 1.7  |
| <i>Tectaria predata</i> <sup>H, 40</sup>            | Eupolypods 1      | Extant   | 1.2  |
| <i>Thelypteris decussata</i> <sup>H, 40</sup>       | Eupolypods 2      | Extant   | 2.1  |
| <i>Thelypteris macrophylla</i> <sup>H, 40</sup>     | Eupolypods 2      | Extant   | 0.9  |
| <i>Thelypteris pennata</i> <sup>H, 40</sup>         | Eupolypods 2      | Extant   | 0.7  |
| <i>Thelypteris serrata</i> <sup>H, 40</sup>         | Eupolypods 2      | Extant   | 1.3  |
| <i>Tilia americana</i> <sup>T, 47</sup>             | Eurosids 2        | Extant   | 8.1  |
| <i>Tilia americana</i> <sup>T, 46</sup>             | Eurosids 2        | Extant   | 10.0 |
| <i>Tilia americana</i> <sup>T, 36</sup>             | Eurosids 2        | Extant   | 11.1 |
| <i>Tilia americana</i> <sup>T, 6</sup>              | Eurosids 2        | Extant   | 5.8  |
| <i>Todites denticulatus</i> <sup>25</sup>           | Osmundales        | Jurassic | 1.9  |
| <i>Todites williamsoni</i> <sup>25</sup>            | Osmundales        | Jurassic | 3.1  |
| <i>Touroulia guianensis</i> <sup>T, 21</sup>        | Eurosids 1        | Extant   | 24.4 |
| <i>Trichipteris procera</i> <sup>T, 40</sup>        | Cyatheales        | Extant   | 1.2  |
| <i>Trichipteris wendlandii</i> <sup>T, 40</sup>     | Cyatheales        | Extant   | 1.3  |
| <i>Trifolium pratense</i> <sup>H, 46</sup>          | Eurosids 1        | Extant   | 12.5 |
| <i>Trifolium repens</i> <sup>H, 6</sup>             | Eurosids 1        | Extant   | 8.2  |
| <i>Trimenia bougainvilleensis</i> <sup>T</sup>      | Basal angiosperms | Extant   | 4.7  |
| <i>Trimenia macurura</i> <sup>V, SHADE</sup>        | Basal angiosperms | Extant   | 2.7  |
| <i>Trimenia macurura</i> <sup>V, SUN</sup>          | Basal angiosperms | Extant   | 3.7  |
| <i>Trimenia marquesensis</i> <sup>T</sup>           | Basal angiosperms | Extant   | 3    |
| <i>Trimenia moorei</i> <sup>V, SHADE</sup>          | Basal angiosperms | Extant   | 4    |
| <i>Trimenia moorei</i> <sup>V, SUN</sup>            | Basal angiosperms | Extant   | 4.6  |
| <i>Trimenia neocaledonica</i> <sup>T, SHADE</sup>   | Basal angiosperms | Extant   | 2.8  |
| <i>Trimenia neocaledonica</i> <sup>T, SUN</sup>     | Basal angiosperms | Extant   | 3.8  |
| <i>Trimenia nukuhivensis</i> <sup>T, SHADE</sup>    | Basal angiosperms | Extant   | 3.3  |
| <i>Trimenia nukuhivensis</i> <sup>T, SUN</sup>      | Basal angiosperms | Extant   | 4.6  |
| <i>Trimenia papuana</i> <sup>T, SHADE</sup>         | Basal angiosperms | Extant   | 3.3  |
| <i>Trimenia papuana</i> <sup>T, SUN</sup>           | Basal angiosperms | Extant   | 4.6  |
| <i>Trimenia weinmanniifolia</i> <sup>T, SHADE</sup> | Basal angiosperms | Extant   | 3.4  |
| <i>Trimenia weinmanniifolia</i> <sup>T, SUN</sup>   | Basal angiosperms | Extant   | 5.7  |
| <i>Tropaeolum majus</i> <sup>H, 46</sup>            | Eurosids 2        | Extant   | 7.1  |
| <i>Ulmus americana</i> <sup>T, 47</sup>             | Eurosids 2        | Extant   | 13.2 |
| <i>Ulmus americana</i> <sup>T, 46</sup>             | Eurosids 2        | Extant   | 14.5 |
| <i>Ulmus americana</i> <sup>T, 36</sup>             | Eurosids 2        | Extant   | 14.4 |
| <i>Ulmus americana</i> <sup>T, 6</sup>              | Eurosids 2        | Extant   | 9.8  |
| <i>Ulmus americana</i> <sup>T, NORTH, 48</sup>      | Eurosids 2        | Extant   | 14.9 |

|                                                |               |          |      |
|------------------------------------------------|---------------|----------|------|
| <i>Ulmus americana</i> <sup>T, SHADE, 48</sup> | Eurosids 2    | Extant   | 10.2 |
| <i>Ulmus americana</i> <sup>T, SOUTH, 48</sup> | Eurosids 2    | Extant   | 15.6 |
| <i>Verbascum thapsus</i> <sup>H, 46</sup>      | Euasterids 1  | Extant   | 10.9 |
| <i>Verbascum thapsus</i> <sup>H, 6</sup>       | Euasterids 1  | Extant   | 12.1 |
| <i>Veronica salicifolia</i> <sup>T, 6</sup>    | Euasterids 1  | Extant   | 5.0  |
| <i>Viburnum ellipticum</i> <sup>T, 46</sup>    | Euasterids 2  | Extant   | 4.9  |
| <i>Vicia faba</i> <sup>H, 46</sup>             | Eurosids 1    | Extant   | 5.6  |
| <i>Viola cucullata</i> <sup>H, 6</sup>         | Eurosids 1    | Extant   | 6.1  |
| <i>Vitex lucens</i> <sup>T, 6</sup>            | Euasterids 1  | Extant   | 6.6  |
| <i>Vitis vulpina</i> <sup>V, 46</sup>          | Basal rosids  | Extant   | 8.1  |
| <i>Warszewiczia coccinea</i> <sup>T, 35</sup>  | Euasterids 1  | Extant   | 10.3 |
| <i>Wolemia nobilis</i> <sup>T</sup>            | Coniferales   | Extant   | 1.3  |
| <i>Woodwardia fimbriata</i> <sup>H, 40</sup>   | Eupolypods 2  | Extant   | 1.4  |
| <i>Xanthium commune</i> <sup>H, 6</sup>        | Euasterids 2  | Extant   | 7.2  |
| <i>Zamia pumila</i> <sup>H, 35</sup>           | Cycadales     | Extant   | 2.1  |
| <i>Zamia pumila</i> <sup>H, 11</sup>           | Cycadales     | Extant   | 2.2  |
| <i>Zamites queenslandi</i> large <sup>4</sup>  | Bennettitales | Triassic | 3.2  |
| <i>Zamites queenslandi</i> small <sup>4</sup>  | Bennettitales | Triassic | 5.9  |
| <i>Zamites gigas</i> <sup>27</sup>             | Bennettitales | Jurassic | 3.5  |

1. Abbott, M. L. 1958 The American species of *Asterophyllites*, *Annularia*, and *Sphenophyllum*. *Bull. Am. Paleontology* **38**, 289-390.
2. Anderson, J. M. & Anderson, H. M. 1983 *Palaeoflora of southern Africa Molteno Formation Volume 1. Introduction and Dicroidium*. Rotterdam: A.A. Balkema.
3. Anderson, J. M. & Anderson, H. M. 1985 *Palaeoflora of southern Africa. Prodrromus of South African megaflores Devonian to Lower Cretaceous*. Rotterdam: A.A. Balkema.
4. Anderson, J. M. & Anderson, H. M. 1989 *Palaeoflora of southern Africa Molteno Formation Volume 2. Gymnosperms (excluding Dicroidium)*. Rotterdam: A.A. Balkema.
5. Anderson, J. M. & Anderson, H. M. 2003 Heyday of the gymnosperms: systematics and biodiversity of the Late Triassic Molteno fructifications. *Strelitzia* **15**, 1-398.
6. Armacost, R. R. 1944 The structure and function of the border parenchyma and vein-ribs of certain dicotyledon leaves. *Proc. Iowa Acad. Sci.* **51**, 157-169.
7. Avery, G. S. 1933 Structure and development of the tobacco leaf. *Am. J. Bot.* **20**, 565-592.
8. Boersma, M. 1972 *The heterogeneity of the form genus *Mariopteris* Zeiller*. Utrecht: University of Utrecht.
9. Boureau, E. 1964 *Tome III: Sphenophyta & Noeggerathiophyta, Traité de paléobotanique*. Paris: Masson et Cie.
10. Boureau, E. & Doubinger, J. 1975 *Tome IV, Fasc.2: Pteridophylla (Premiere Partie), Traité de paléobotanique*. Paris: Masson et Cie.
11. Brashier, C. K. 1968 Vascularization of cycad leaflets. *Phytomorphology* **18**, 35-43.
12. Brousmiche, C. 1983 Les fougères sphénoptéridiennes du bassin houiller Sarroloirain. *Société Géologique du Nord, Lille* **10**, 1-480.

13. Buisine, M. 1961 Les Aléthroptéridées du Nord de la France. *Études Géologiques pour l'Atlas de Topographie Souterraine* **4**, 1-317.
14. Candela, H., Martinez-Laborda, A. & Micol, J. L. 1999 Venation pattern formation in *Arabidopsis thaliana* vegetative leaves. *Developmental Biology* **205**, 205-216.
15. Crookall, R. 1955 Fossil plants of the Carboniferous rocks of Great Britain. *Memoirs of the Geological Survey of Great Britain, Palaeontology* **4**, 1-84.
16. Crookall, R. 1957 Fossil plants of the Carboniferous rocks of Great Britain. *Memoirs of the Geological Survey of Great Britain, Palaeontology* **4**, 85-216.
17. Crookall, R. 1970 Fossil plants of the Carboniferous rocks of Great Britain. *Memoirs of the Geological Survey of Great Britain, Palaeontology* **4**, 793-840.
18. Dalinval, A. 1960 Les *Pecopteris* de bassin houiller de Nord de la France. *Études Géologiques pour l'Atlas de Topographie Souterraine* **3**, 1-222.
19. Danze-Corsin, P. 1953 Les *Mariopteris* du Nord de la France du Bassin houillier du Nord et du Pas-le-Calais. *Études Géologiques pour l'Atlas de Topographie Souterraine* **1**, 1-269.
20. DiMichele, W. A., Chaney, D. S., Nelson, W. J., Lucas, S. G., Looy, C. V., Quick, K. & Jun, W. 2007 A low diversity, seasonal tropical landscape dominated by conifers and peltasperms: Early Permian Abo Formation, New Mexico. *Review of Palaeobotany and Palynology* **145**, 249-273.
21. Foster, A. S. 1950 Venation and histology of the leaflets in *Touroulia guianensis* Aubl. and *Froesia tricarpa* Pires. *Am. J. Bot.* **37**, 848-862.
22. Gensel, P. G. & Andrews, H. N. 1984 *Plant Life in the Devonian*. New York: Praeger Publishers.
23. Glasspool, I. J., Hilton, J., Collinson, M. E., Wang, S.-J., Sen, L.-C. 2004 Foliar physiognomy in Cathaysian gigantopterids and the potential to track Palaeozoic climates using an extinct plant group. *Palaeogeography, Palaeoclimatology, Palaeoecology* **205**, 69-110.
24. Harms, V. L. & Leisman, G. A. 1961 The anatomy and morphology of certain *Cordaites* leaves. *Journal of Paleontology* **35**, 1041-1064.
25. Harris, T. M. 1961 *The Yorkshire Jurassic Flora Volume 1 Thallophyta-Pteridophyta*. London: British Museum of Natural History.
26. Harris, T. M. 1964 *The Yorkshire Jurassic Flora Volume 2 Caytoniales, Cycadales, and Pteridosperms*. London: British Museum of Natural History.
27. Harris, T. M. 1969 *The Yorkshire Jurassic Flora Volume 3 Bennettitales*. London: British Museum of Natural History.
28. Harris, T. M., Millington, W. & Miller, J. 1974 *The Yorkshire Jurassic Flora Volume 4 Ginkgoales and Czekanowskiales*. London: British Museum of Natural History.
29. Hogermann, C. 1990 Leaf venation. In *Stratification of Tropical Forests as Seen in Leaf Structure* (eds B. Rollet, C. Hogermann & I. Roth), pp 77-183. Netherlands: Kluwer.
30. Kerp, J. H. F. 1988 Aspects of Permian of palaeobotany and palynology. X. The west and central European species of the genus *Autunia* Krasser emend. Kerp (Peltaspermataceae) and the form-genus *Callipteris* Brongniart 1849. *Review of*

- Palaeobotany and Palynology* **54**, 249-360.
31. Kidston, R. 1923-25 Fossil plants of the Carboniferous rocks of Great Britain. *Memoirs of the Geological Survey of Great Britain, Palaeontology* **2**, 1-681.
  32. Kramer, K. U. & Green, P. S. 1990 *The Families and Genera of Vascular Plants. I. Pteridophytes and Gymnosperms* (ed K. Kubitzki) Berlin: Springer-Verlag.
  33. Laveine, J.-P. 1967 Les Neuroptéridées du Nord de la France. *Études Géologiques pour l'Atlas de Topographie Souterrain, Houillères des Bassins du Nord Pas de Calais* **1**, 1-344.
  34. Laveine, J.-P., Coquel, R. & Loboziak, S. 1977 Phylogénie générale des Calliptéridiacées (Pteridospermopsida). *Géobios* **10**, 757-847.
  35. Noblin, X., Mahadevan, L., Coomaraswamy, I. A., Weitz, D. A., Holbrook, N. M. & Zwieniecki, M. A. 2008 Optimal vein density in artificial and real leaves. *Proc. Natl Acad. Sci. USA* **105**, 9140-9144.
  36. Plymale, E. L. & Wylie, R. B. 1944 The major veins of mesomorphic leaves. *Am. J. Bot.* **31**, 99-106.
  37. Remy, W. & Remy, R. 1959 *Pflanzenfossilien*. Berlin: Akademie-Verlag.
  38. Rodin, R. J. 1966 Leaf structure and evolution in American species of *Gnetum*. *Phytomorphology* **16**, 56-68.
  39. Roth, I. 1996 Microscopic venation patterns of leaves and their importance in the distinction of (tropical) species. *Handbuch der Pflanzenanatomie*. Berlin: Gebrüder Borntraeger.
  40. Tryon, R. M. & Tryon, A. F. 1982 *Ferns and allied plants with special reference to tropical America*. New York: Springer-Verlag.
  41. Ueno, O., Kawano, Y., Wakayama, M. & Takeda, T. 2006 Leaf Vascular Systems in C<sub>3</sub> and C<sub>4</sub> Grasses: A Two-dimensional Analysis. *Ann. Bot.* **97**, 611-621.
  42. van Konijnenburg-van Cittert, J. H. A. & Morgans, H. S. 1999 *The Jurassic flora of Yorkshire*. London: Palaeontological Association.
  43. Wagner, R. H. 1958 *Lobopteris alloiopteroides*, una nueva especie de Pecopterioidea del Estefaniense A español. *Estudios Geológicos* **38**, 81-95.
  44. Wagner, R. H. 1961 Some Alethopterideae from the South Limburg Coalfield. *Mededelingen van de Geologische Stichting, Nieuwe Serie* **14**, 5-13.
  45. Wagner, R. H. 1968 *Upper Westphalian and Stephanian species of Alethopteris*. Maastricht: Uitgevers-Maatschappij.
  46. Wylie, R. B. 1939 Relations between tissue organization and vein distribution in dicotyledon leaves. *Am. J. Bot.* **26**, 219-225.
  47. Wylie, R. B. 1946 Relations between tissue organization and vascularization in leaves of certain tropical and subtropical dicotyledons. *Am. J. Bot.* **33**, 721-726.
  48. Wylie, R. B. 1951 Principles of foliar organization shown by sun-shade leaves from ten species of deciduous dicotyledonous trees. *Am. J. Bot.* **38**, 355-361.
