# Supplementary material
Source: PubMed Central journal article supplement (PMC2674498)
Supplement: rspb20081919s07.pdf [file rspb20081919s07.pdf]

**Table 2:** Maximum stomatal conductance and vein density.

| Species                       | Conductance<br>(mol H <sub>2</sub> O/m <sup>2</sup> s <sup>2</sup> ) | St. dev. | Vein density<br>(mm/mm <sup>2</sup> ) | St. dev. |
|-------------------------------|----------------------------------------------------------------------|----------|---------------------------------------|----------|
| FERNS                         |                                                                      |          |                                       |          |
| <i>Lygodium venustum</i>      | 0.1090                                                               | 0.0234   | 2.77                                  | 0.73     |
| <i>Tectaria confluens</i>     | 0.0738                                                               | 0.0183   | 1.29                                  | 0.12     |
| <i>Dipteris conjugata</i>     | 0.1703                                                               | 0.0269   | 4.36                                  | 0.43     |
| <i>Bolbitis portoricensis</i> | 0.0665                                                               | 0.0300   | 1.47                                  | 0.20     |
| <i>Polypodium triseriale</i>  | 0.0449                                                               | 0.0155   | 0.95                                  | 0.17     |
| <i>Pteris altissima</i>       | 0.1363                                                               | 0.0271   | 1.80                                  | 0.23     |
| CONIFERS                      |                                                                      |          |                                       |          |
| <i>Agathis robusta</i>        | 0.062                                                                | 0.011    | 1.19                                  | 0.17     |
| <i>Nageia nagi</i>            | 0.0908                                                               | 0.0510   | 1.78                                  | 0.58     |
| ANGIOSPERMS                   |                                                                      |          |                                       |          |
| <i>Eucalyptus globules</i>    | 0.3592                                                               | 0.0621   | 9.40                                  | 0.78     |
| <i>Byrsonema crassifolia</i>  | 0.4488                                                               | 0.0436   | 15.36                                 | 1.37     |
| <i>Curatela Americana</i>     | 0.3743                                                               | 0.0415   | 16.16                                 | 2.88     |
| <i>Dalbergia retusa</i>       | 0.6619                                                               | 0.0650   | 13.45                                 | 0.94     |
| <i>Genipa Americana</i>       | 0.4161                                                               | 0.0425   | 10.60                                 | 0.82     |
| <i>Rhedera trinervis</i>      | 0.4118                                                               | 0.0879   | 11.07                                 | 0.36     |
| <i>Bedfordia salicina</i>     | 0.2500                                                               | 0.0349   | 5.70                                  | 0.49     |
| <i>Amborella trichopoa</i>    | 0.1800                                                               | 0.0380   | 2.28                                  | 0.15     |
| <i>Simarouba glauca</i>       | 0.6020                                                               | 0.0480   | 14.80                                 | 1.81     |
| <i>Pharus lappulacius</i>     | 0.1348                                                               | 0.0207   | 2.90                                  | 0.14     |
| <i>Hyparrhenia rufa</i>       | 0.3885                                                               | 0.0863   | 11.28                                 | 1.47     |
